# Supplementary material
Source: publisher figshare collection journal article supplement (https://gsajournals.figshare.com/ndownloader/files/15037703)
Supplement: Supplementary file 1 [file 15037703]

## Sheet: Sheet1
Table S1. Functional summary of the B. cinerea genetic targets of B. cinerea hotspots.
Total annotated	412
Enzyme	140
Heterokaryon domain	1
Gene with a peak of expression during the outset of colonization	2
TF	11
Gene induced in early infection stage	1
Expressed in planta	1
Mitogen-activated protein kinase	2
These count occurrences of major functional categories among the hotspot target genes.
